# Supplementary material for: Identity and nature of neural stem cells in the adult human subventricular zone
Source: PubMed Central journal article supplement — iScience. 2024 Feb 27;27(4):109342. doi: 10.1016/j.isci.2024.109342 (PMC10940989; doi:10.1016/j.isci.2024.109342), 2024-02-27
Supplement: mmc1.pdf [file mmc1.pdf]

## **Supplemental information**

### **Identity and nature of neural stem cells in the adult human subventricular zone**

**Salma Baig, Javad Nadaf, Redouane Allache, Phuong U. Le, Michael Luo, Annisa Djedid, Andrianiaina Nkili-Meyong, Maryam Safisamghabadi, Alex Prat, Jack Antel, Marie-Christine Guiot, and Kevin Petrecca**

| SAMPLE | AGE | SEX | DIAGNOSIS                 |
|--------|-----|-----|---------------------------|
| SVZ337 | 53  | M   | Astrocytoma grade 3       |
| SVZ350 | 51  | M   | Glioblastoma              |
| SVZ359 | 51  | M   | Astrocytoma grade 3       |
| SVZ373 | 62  | M   | Glioblastoma              |
| SVZ375 | 70  | F   | Metastatic adenocarcinoma |
| SVZ376 | 55  | M   | Glioblastoma              |
| SVZ379 | 38  | M   | Astrocytoma grade 2       |
| SVZ383 | 63  | M   | Glioblastoma              |
| SVZ391 | 62  | M   | Large cell carcinoma      |
| SVZ395 | 72  | F   | Glioblastoma              |
| SVZ400 | 72  | F   | Glioblastoma              |
| SVZ420 | 57  | F   | Glioblastoma              |
| SVZ423 | 64  | F   | Glioblastoma              |
| SVZ428 | 45  | M   | Glioblastoma              |
| SVZ444 | 71  | F   | Glioblastoma              |

**Figure S1.** Subventricular zone sample acquisition demographics, related to Figure 1A.

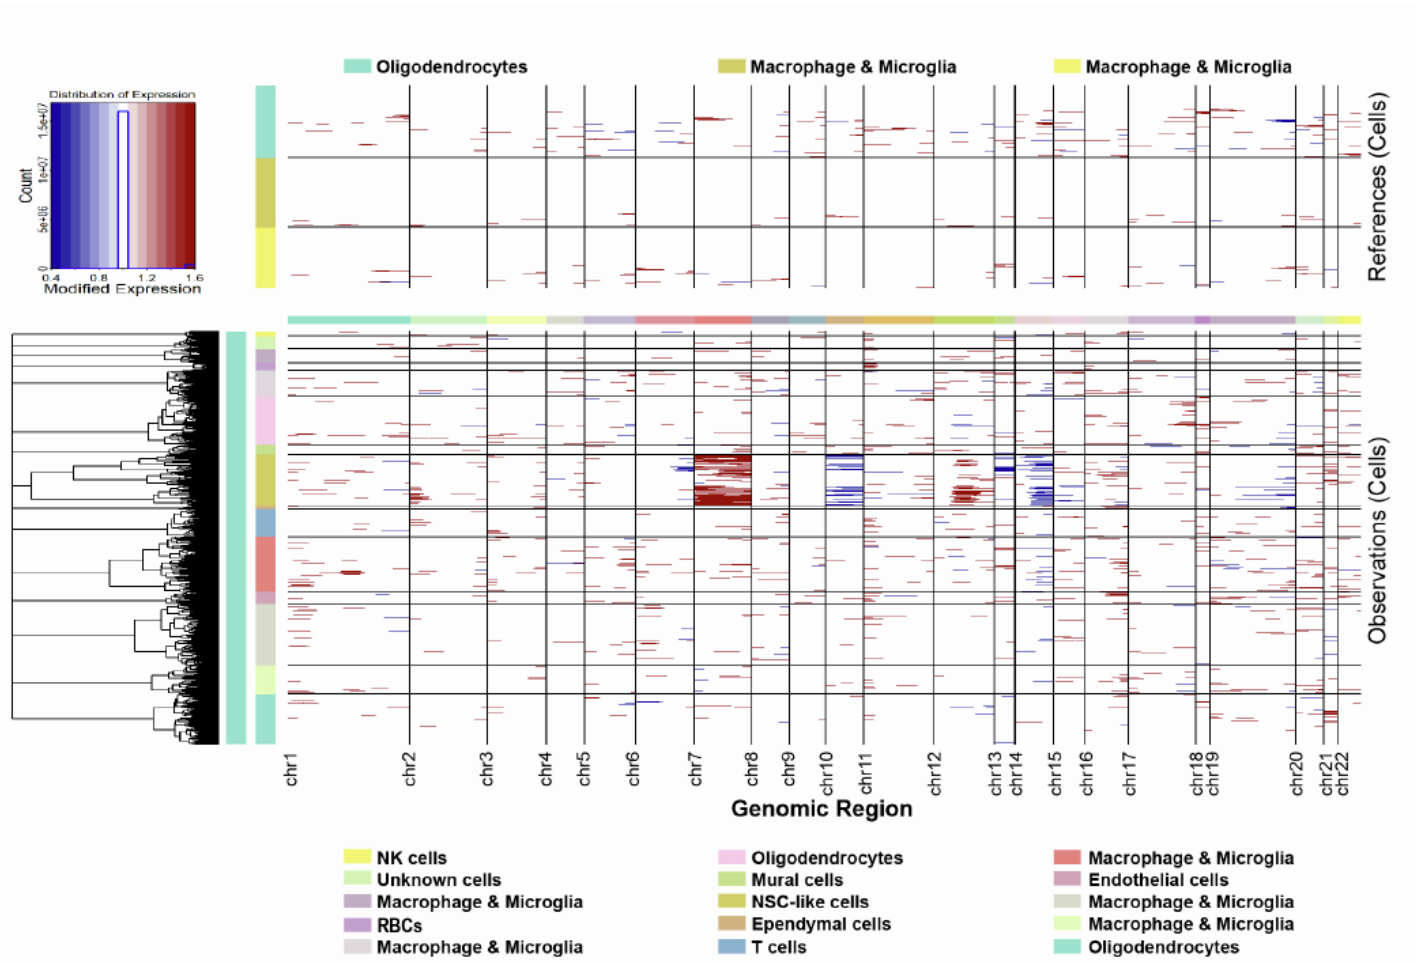

**Figure S2.** Copy number alteration analysis of all subventricular cells, related to Figure 1B.

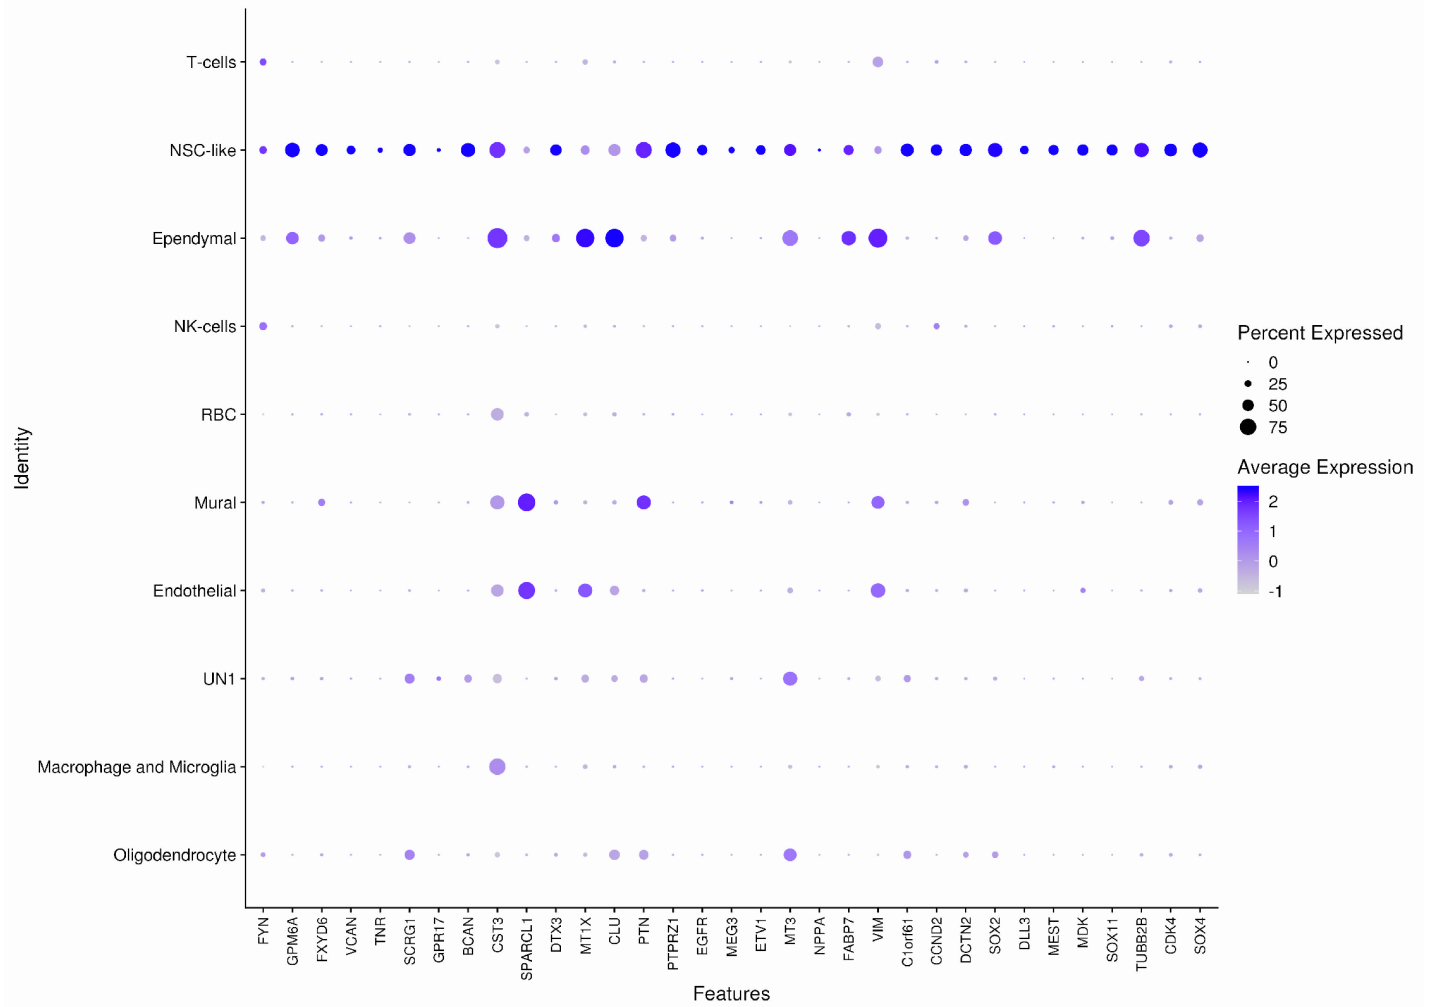

**Figure S3.** Dot plot of the top differentially expressed genes across all major SVZ cell types, related to Figure 2C, D, and E.
